# Supplementary material for: A Field-Based Approach to Determine Soft Tissue Injury Risk in Elite Futsal Using Novel Machine Learning Techniques
Source: Front Psychol. 2021 Feb 5;12:610210. doi: 10.3389/fpsyg.2021.610210 (PMC7892460; doi:10.3389/fpsyg.2021.610210)
Supplement: Supplementary File 1 — TRIPOD checklist: prediction model development and validation. [file Table_1.DOCX]

| **Supplementary file 1.** TRIPOD Checklist: Prediction Model Development and Validation | | | | |
| --- | --- | --- | --- | --- |
| **Section/Topic** | **Item**  **Page** | **Checklist Item** | | |
| **Title and abstract** | | |  | |
| Title | 1 | D-V | Identify the study as developing and/or validating a multivariable prediction model, the target population, and the outcome to be predicted. | 183 |
| Abstract | 2 | D-V | Provide a summary of objectives, study design, setting, participants, sample size, predictors, outcome, statistical analysis, results, and conclusions. | 183 |
| **Introduction** | | | | |
| Background and  objectives | 3a | D-V | Explain the medical context (including whether diagnostic or prognostic) and rationale for developing or validating the multivariable prediction model, including references to existing models | 185 |
| 3b | D-V | Specify the objectives, including whether the study describes the development or validation of the model or both | 187 |
| **Methods** | | | | |
| Source of data | 4a | D-V | Describe the study design or source of data (e.g., randomized trial, cohort, or registry data), separately for the development and validation data sets, if applicable | 188 |
| 4b | D-V | Specify the key study dates, including start of accrual; end of accrual; and, if applicable, end of follow-up | 189 |
| Participants | 5a | D-V | Specify key elements of the study setting (e.g., primary care, secondary care, general population) including number and location of centres. | 187 |
| 5b | D-V | Describe eligibility criteria for participants. | 188 |
| 5c | D-V | Give details of treatments received, if relevant. | - |
| Outcome | 6a | D-V | Clearly define the outcome that is predicted by the prediction model, including how and when assessed. | 191 |
| 6b | D-V | Report any actions to blind assessment of the outcome to be predicted. |  |
| Predictors | 7a | D-V | Clearly define all predictors used in developing or validating the multivariable prediction model, including how and when they were measured. | 189 |
| 7b | D-V | Report any actions to blind assessment of predictors for the outcome and other predictors. | - |
| Sample size | 8 | D-V | Explain how the study size was arrived at. | - |
| Missing data | 9 | D-V | Describe how missing data were handled (e.g., complete-case analysis, single imputation, multiple imputation) with details of any imputation method. | 192 |
| Statistical analysis methods | 10a | D | Describe how predictors were handled in the analyses. | 192 |
| 10b | D | Specify type of model, all model-building procedures (including any predictor selection), and method for internal validation. | 193 |
| 10c | V | For validation, describe how the predictions were calculated. | 193 |
| 10d | D-V | Specify all measures used to assess model performance and, if relevant, to compare multiple models. | 193 |
| 10e | V | Describe any model updating (e.g., recalibration) arising from the validation, if done. | 194 |
| Risk groups | 11 | D-V | Provide details on how risk groups were created, if done. | 193 |
| Development  vs. validation | 12 | V | For validation, identify any differences from the development data in setting, eligibility criteria, outcome, and predictors. | 193 |
| **Results** | | | | |
| Participants | 13a | D-V | Describe the flow of participants through the study, including the number of participants with and without the outcome and, if applicable, a summary of the follow-up time. A diagram may be helpful. | - |
| 13b | D-V | Describe the characteristics of the participants (basic demographics, clinical features, available predictors), including the number of participants with missing data for predictors and outcome. | 187 |
| 13c | V | For validation, show a comparison with the development data of the distribution of important variables (demographics, predictors and outcome). | - |
| Model development | 14a | D | Specify the number of participants and outcome events in each analysis. | 187 |
| 14b | D | If done, report the unadjusted association between each candidate predictor and outcome. | 189 |
| Model specification | 15a | D | Present the full prediction model to allow predictions for individuals (i.e., all regression coefficients, and model intercept or baseline survival at a given time point). | 193 |
| 15b | D | Explain how to the use the prediction model. | 202 |
| Model performance | 16 | D-V | Report performance measures (with CIs) for the prediction model. | appx. |
| Model-updating | 17 | V | If done, report the results from any model updating (i.e., model specification, model performance). | 8-10-SInf |
| **Discussion** | | | | |
| Limitations | 18 | D-V | Discuss any limitations of the study (such as non-representative sample, few events per predictor, missing data). | 210 |
| Interpretation | 19a | V | For validation, discuss the results with reference to performance in the development data, and any other validation data. | 207 |
| 19b | D-V | Give an overall interpretation of the results, considering objectives, limitations, results from similar studies, and other relevant evidence. | 207 |
| Implications | 20 | D-V | Discuss the potential clinical use of the model and implications for future research. | 207 |
| **Other information** | | | | |
| Supplementary information | 21 | D-V | Provide information about the availability of supplementary resources, such as study protocol, Web calculator, and data sets. | appx. |
| Funding | 22 | D-V | Give the source of funding and the role of the funders for the present study. | - |
| *Items relevant only to the development of a prediction model are denoted by D, items relating solely to a validation of a prediction model are denoted by V, and items relating to both are denoted D-V. We recommend using the TRIPOD Checklist in conjunction with the TRIPOD Explanation and Elaboration document. | | | | |
